# Supplementary material for: A new oxime synthesized from Senecio nutans SCh. Bip (chachacoma) reduces calcium influx in the vascular contractile response in rat aorta
Source: Royal Society of Chemistry journal article supplement (doi:10.1039/d4ra01058b), 2024-01-01
Supplement: d4ra01058b1.pdf [file d4ra01058b1.pdf]

## Supplementary information

### **Reduction of Calcium Influx in the Vascular Contractile Response in Rat Aorta by a New Oxime Synthesized from *Senecio nutans* SCh. Bip (Chachacoma)**

Javier Palacios <sup>a\*</sup>, Daniel Asunción-Alvarez <sup>a</sup>, Diego Aravena <sup>a</sup>, Mario Chiong <sup>b</sup>, Marcelo A. Catalán <sup>c</sup>, Claudio Parra <sup>d</sup>, Fredi Cifuentes <sup>e</sup>, Adrián Paredes <sup>f\*</sup>

---

<sup>a</sup> Laboratorio de Bioquímica Aplicada, Facultad de Ciencias de la Salud, Universidad Arturo Prat, Iquique 1110939, Chile. [cpalaci@unap.cl](mailto:cpalaci@unap.cl) (J.P.);

[holbertasuncion.pharm@gmail.com](mailto:holbertasuncion.pharm@gmail.com) (D.A.A.); [diego.andresx21@gmail.com](mailto:diego.andresx21@gmail.com) (D.A.)

<sup>b</sup> Universidad de Chile, Advanced Center for Chronic Diseases (ACCDIS), Facultad de Ciencias Químicas y Farmacéuticas, Santiago, Chile. [mchiong@ciq.uchile.cl](mailto:mchiong@ciq.uchile.cl) (M.C.)

<sup>c</sup> Instituto de Fisiología, Facultad de Medicina, Universidad Austral de Chile, Valdivia 5090000, Chile. [marcelo.catalan@uach.cl](mailto:marcelo.catalan@uach.cl) (M.A.C.)

<sup>d</sup> Departamento de Química Orgánica, Facultad de Ciencias Químicas, Universidad de Concepción, Edmundo Larenas 129, Concepción 4070371, Chile.

[cparra@udec.cl](mailto:cparra@udec.cl) (C.P.)

<sup>e</sup> Laboratorio de Fisiología Experimental (EPhyL), Instituto Antofagasta (IA), Universidad de Antofagasta, Antofagasta 1271155, Chile.

[fredi.cifuentes.jorquera@gmail.com](mailto:fredi.cifuentes.jorquera@gmail.com) (F.C.)

<sup>f</sup> Departamento de Química, Facultad de Ciencias Básicas, Universidad de Antofagasta, Antofagasta 1271155, Chile. [adrian.paredes@uantof.cl](mailto:adrian.paredes@uantof.cl) (A.P.)

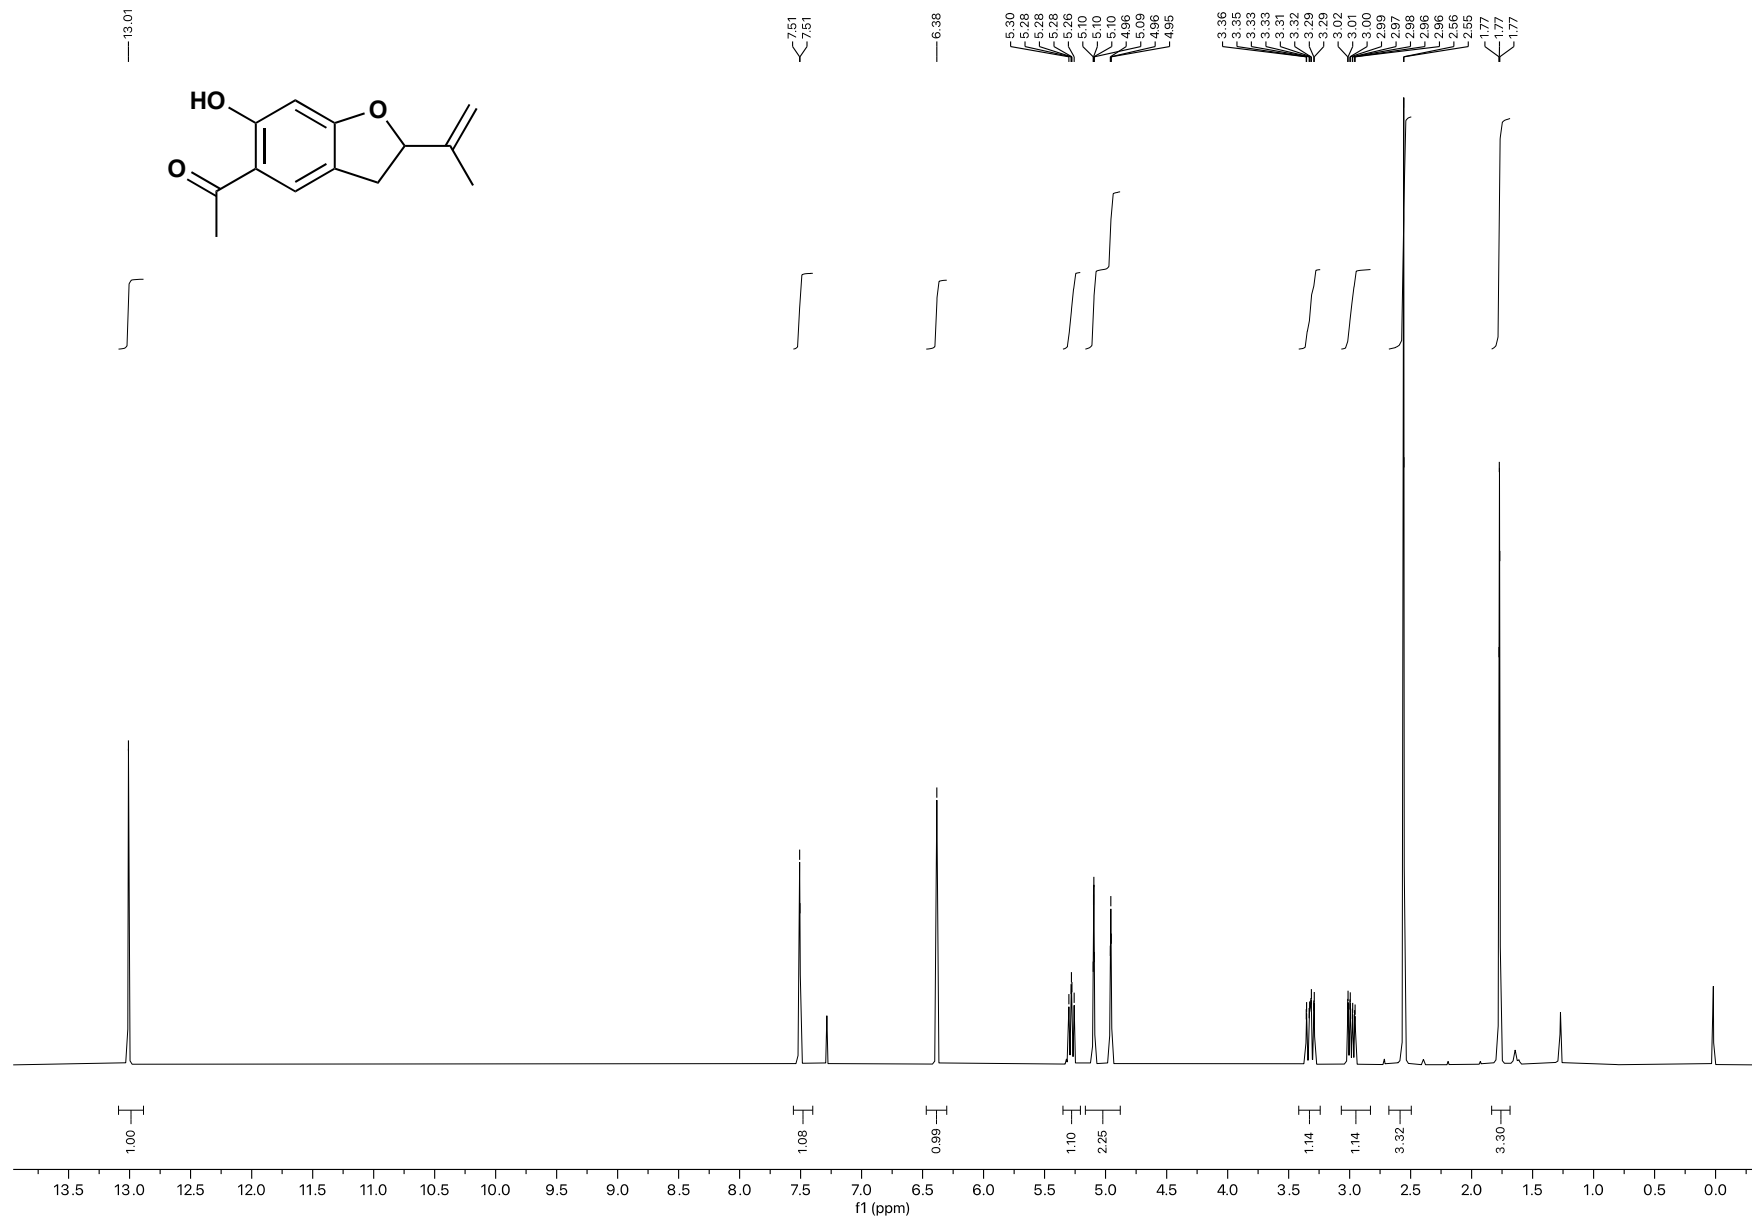

Supplementary figure 1.- <sup>1</sup>H NMR spectrum of 6-hydroxy-2-isopropenyl-5-acetyl-2,3-dihydrobenzofuran

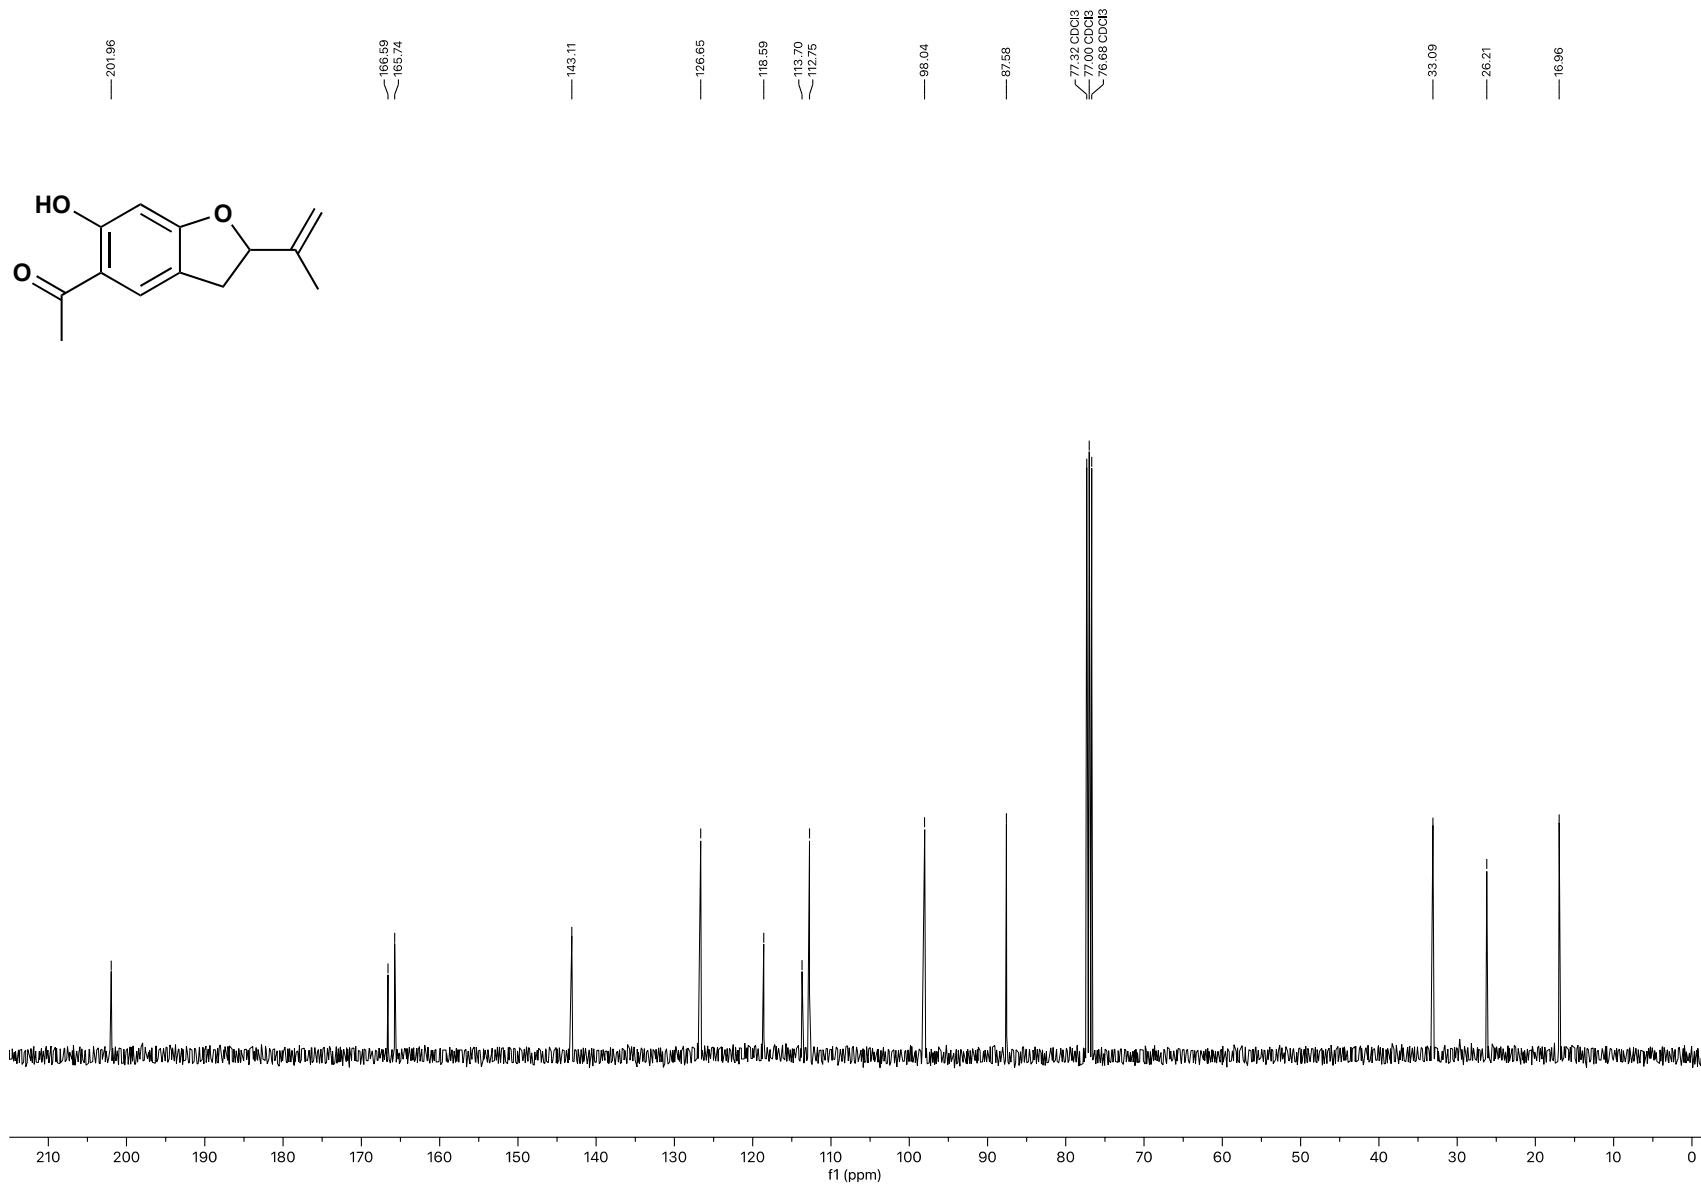

Supplementary figure 2.- <sup>13</sup>C NMR spectrum of 6-hydroxy-2-isopropenyl-5-acetyl-2,3-dihydrobenzofuran

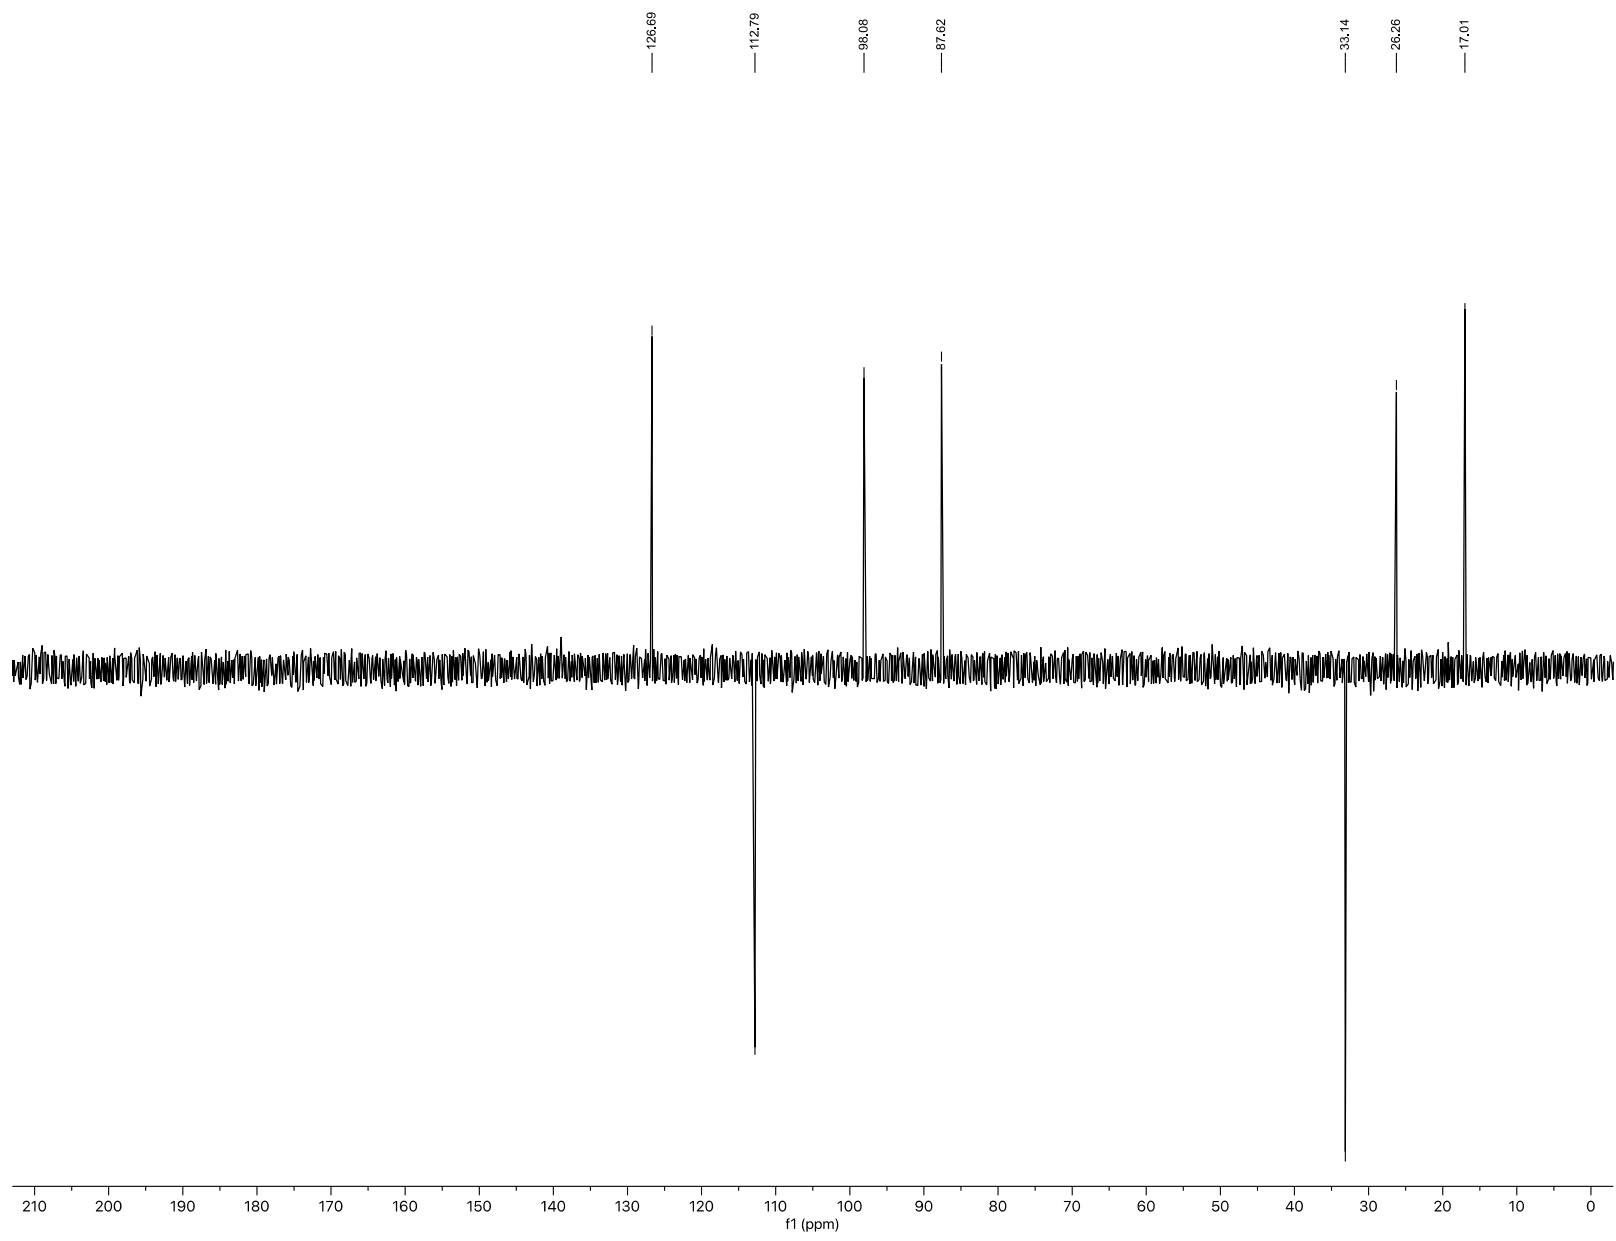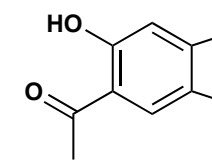

Supplementary figure 3.- DEPT135 spectrum of 6-hydroxy-2-isopropenyl-5-acetyl-2,3-dihydrobenzofuran

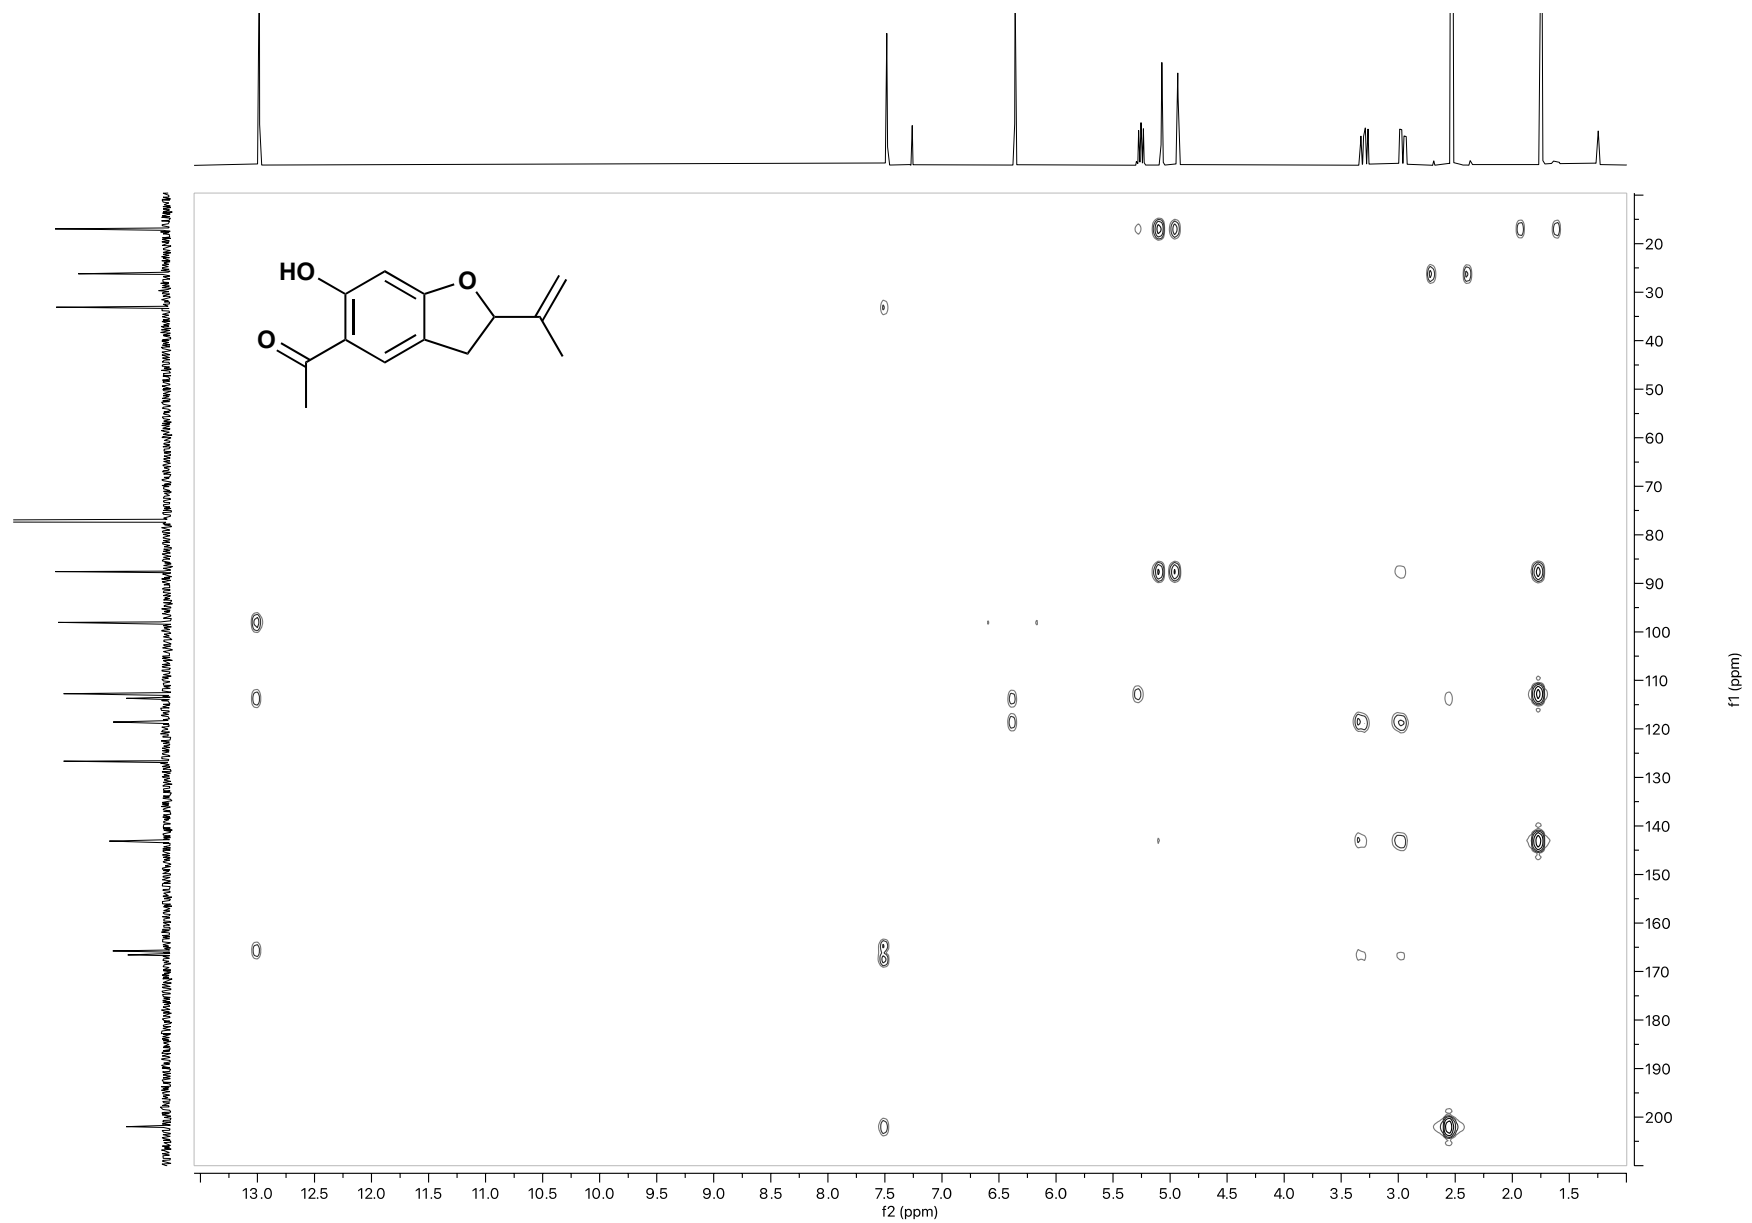

Supplementary figure 4.- HMBC spectrum of 6-hydroxy-2-isopropenyl-5-acetyl-2,3-dihydrobenzofuran

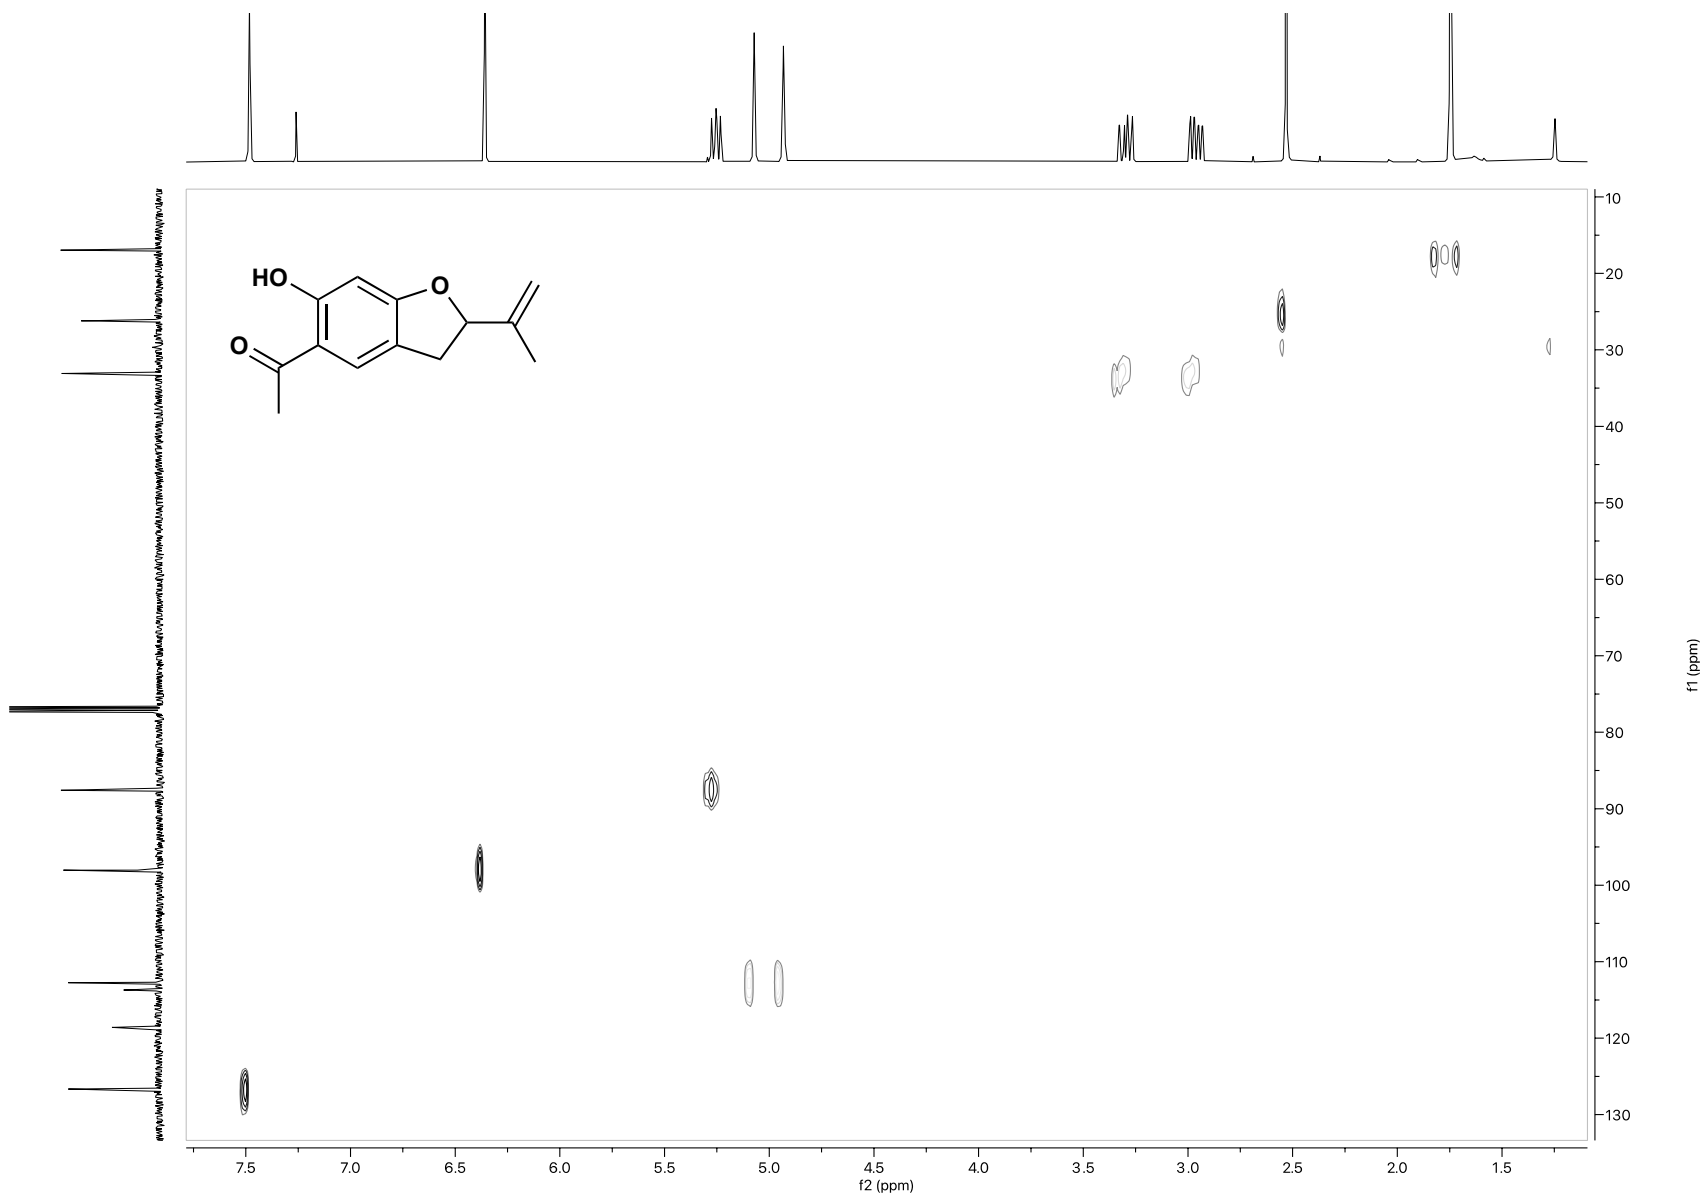

Supplementary figure 5.- HMBC spectrum of 6-hydroxy-2-isopropenyl-5-acetyl-2,3-dihydrobenzofuran

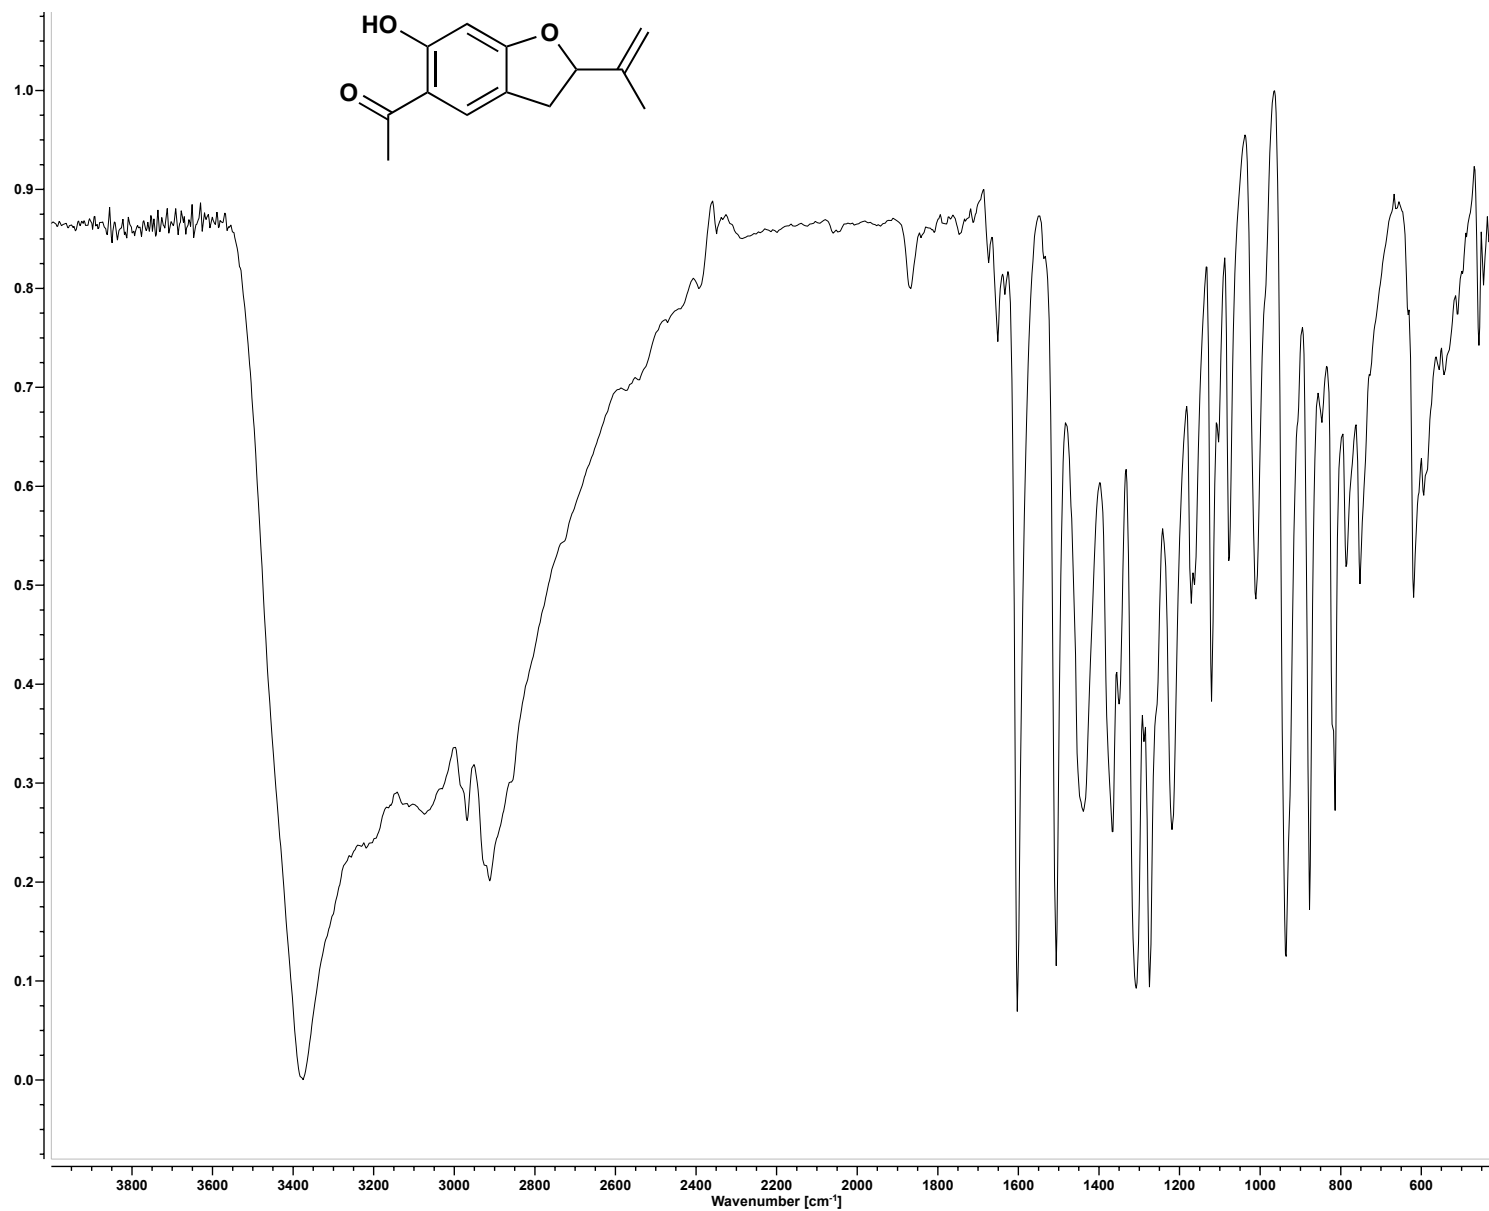

**Supplementary figure 6.- FT-IR spectrum of 6-hydroxy-2-isopropenyl-5-acetyl-2,3-dihydrobenzofuran**

6.

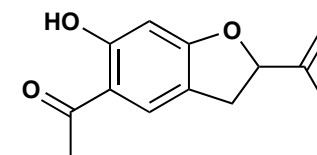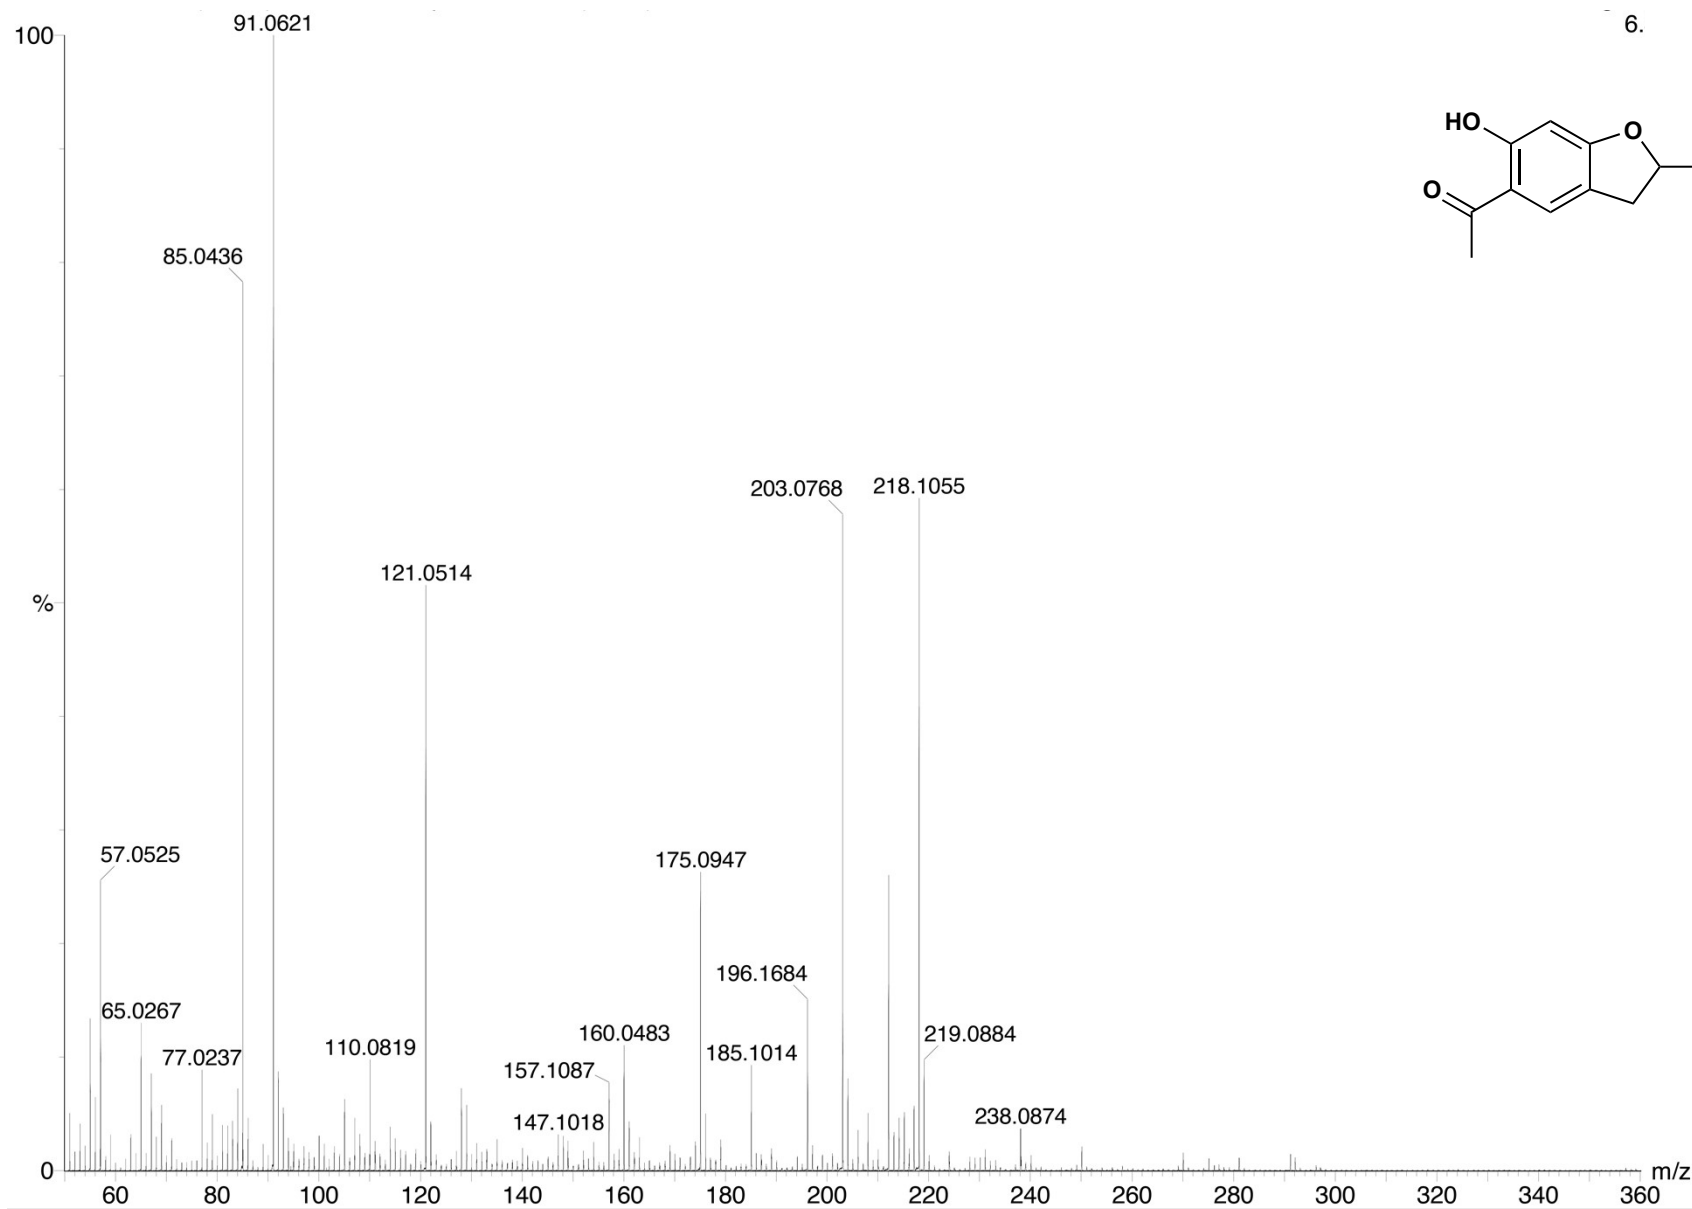

**Supplementary figure 7.-** HR EI-MS spectrum of 6-hydroxy-2-isopropenyl-5-acetyl-2,3-dihydrobenzofuran



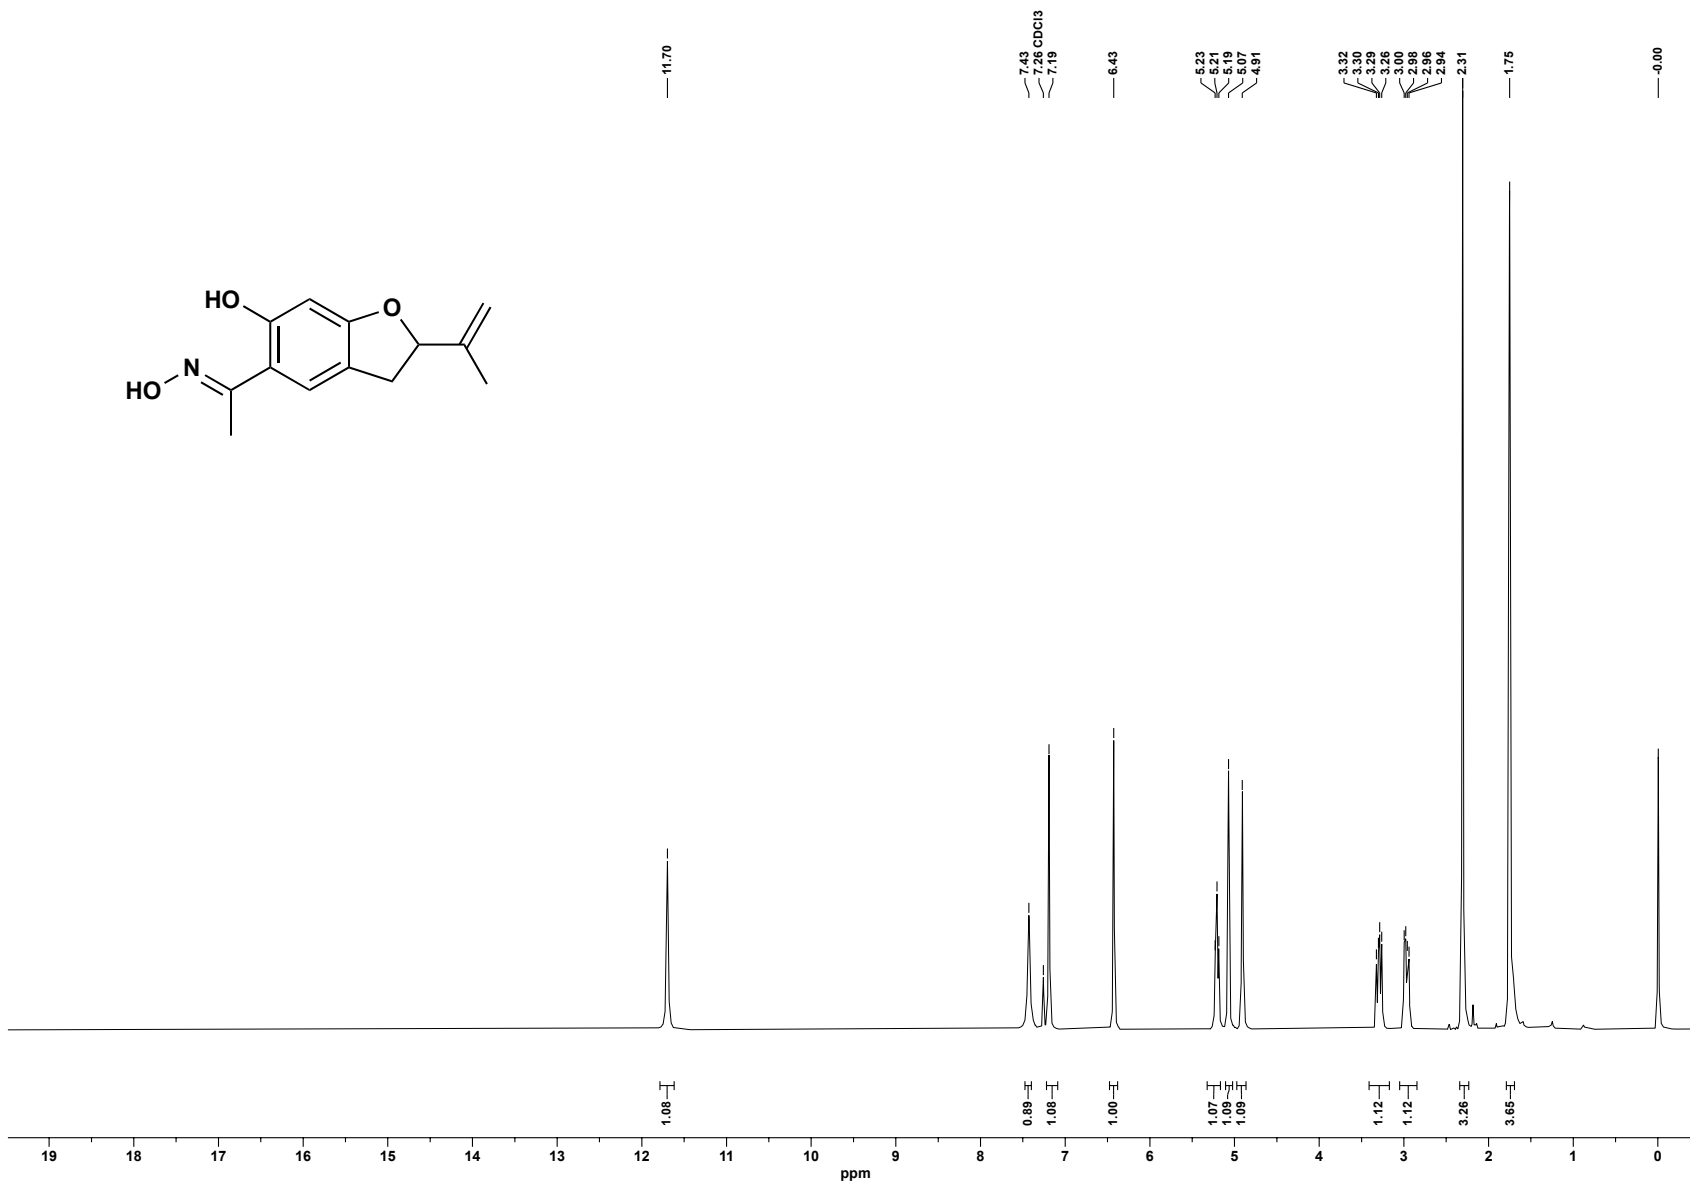

Supplementary figure 8.- <sup>1</sup>H NMR spectrum of 6-hydroxy-2-isopropenyl-5-acetyloxime-2,3-dihydrobenzofuran

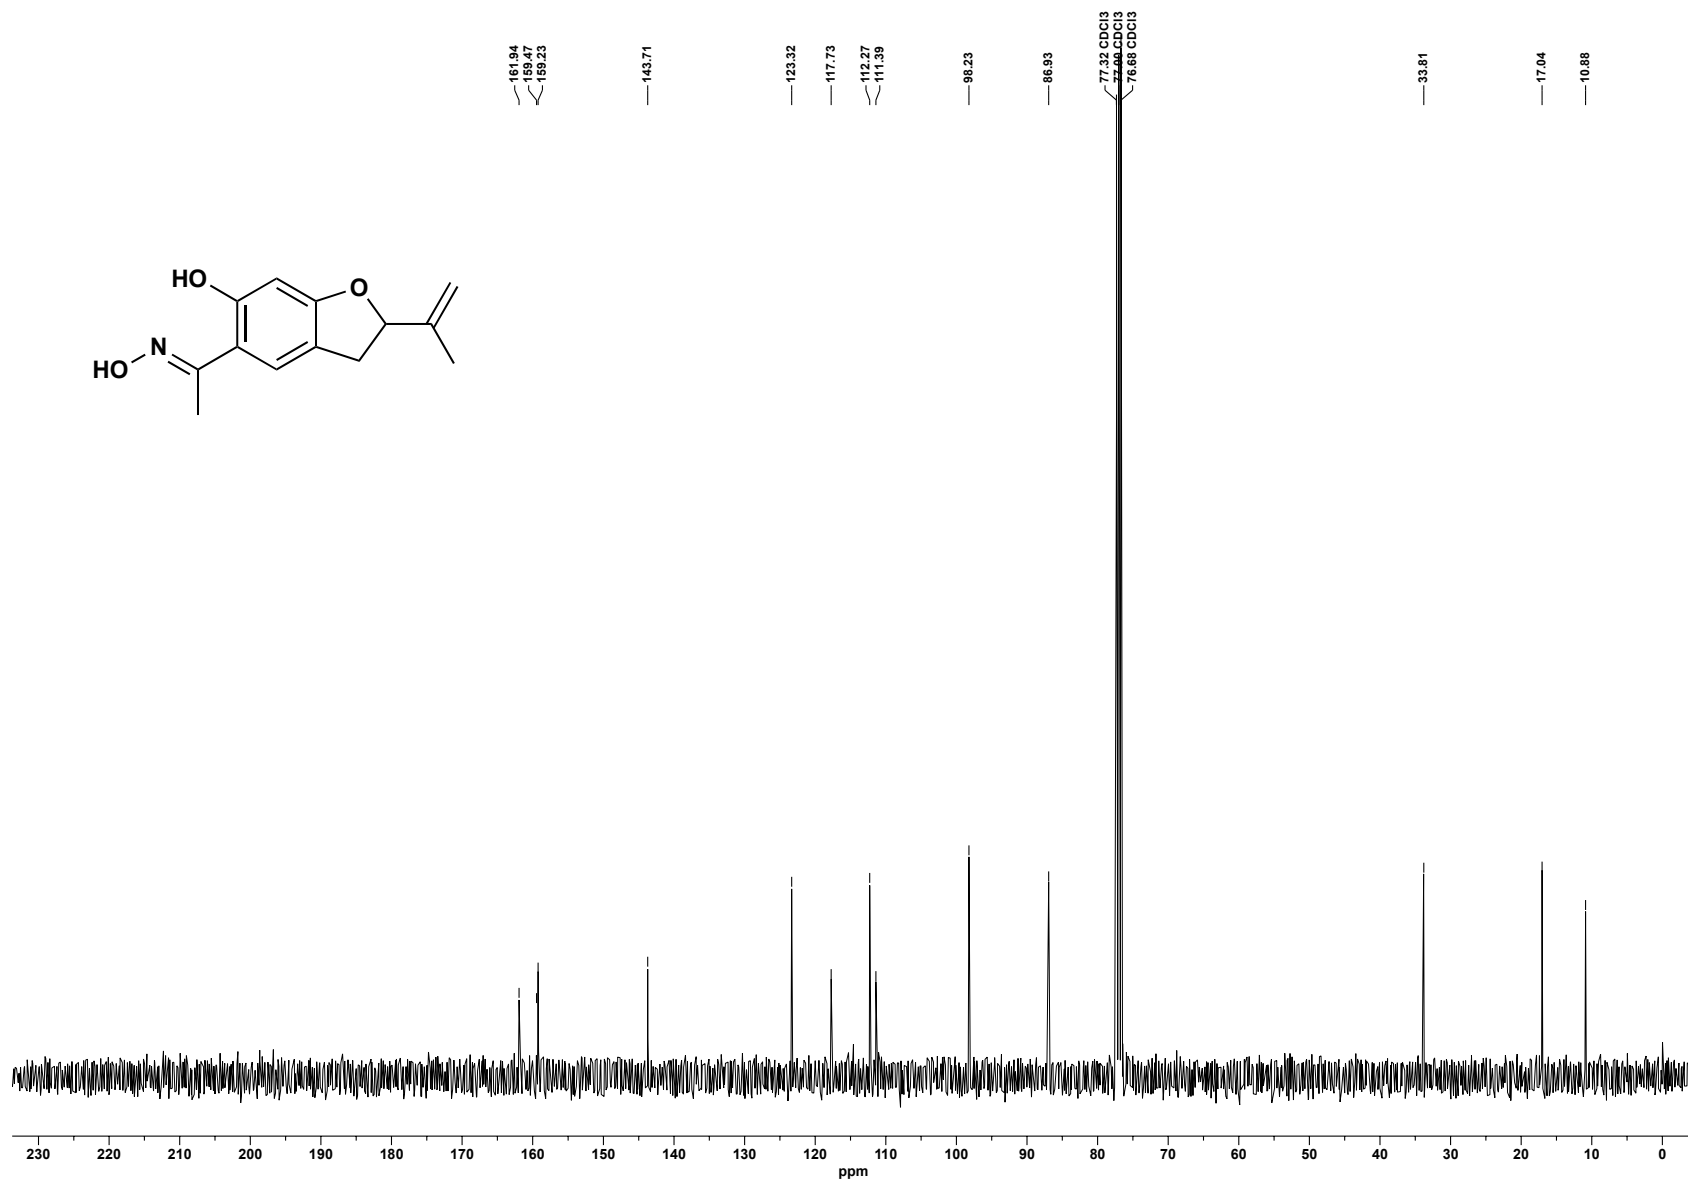

Supplementary figure 9.- <sup>13</sup>C NMR spectrum of 6-hydroxy-2-isopropenyl-5-acetyloxime-2,3-dihydrobenzofuran

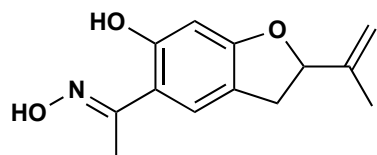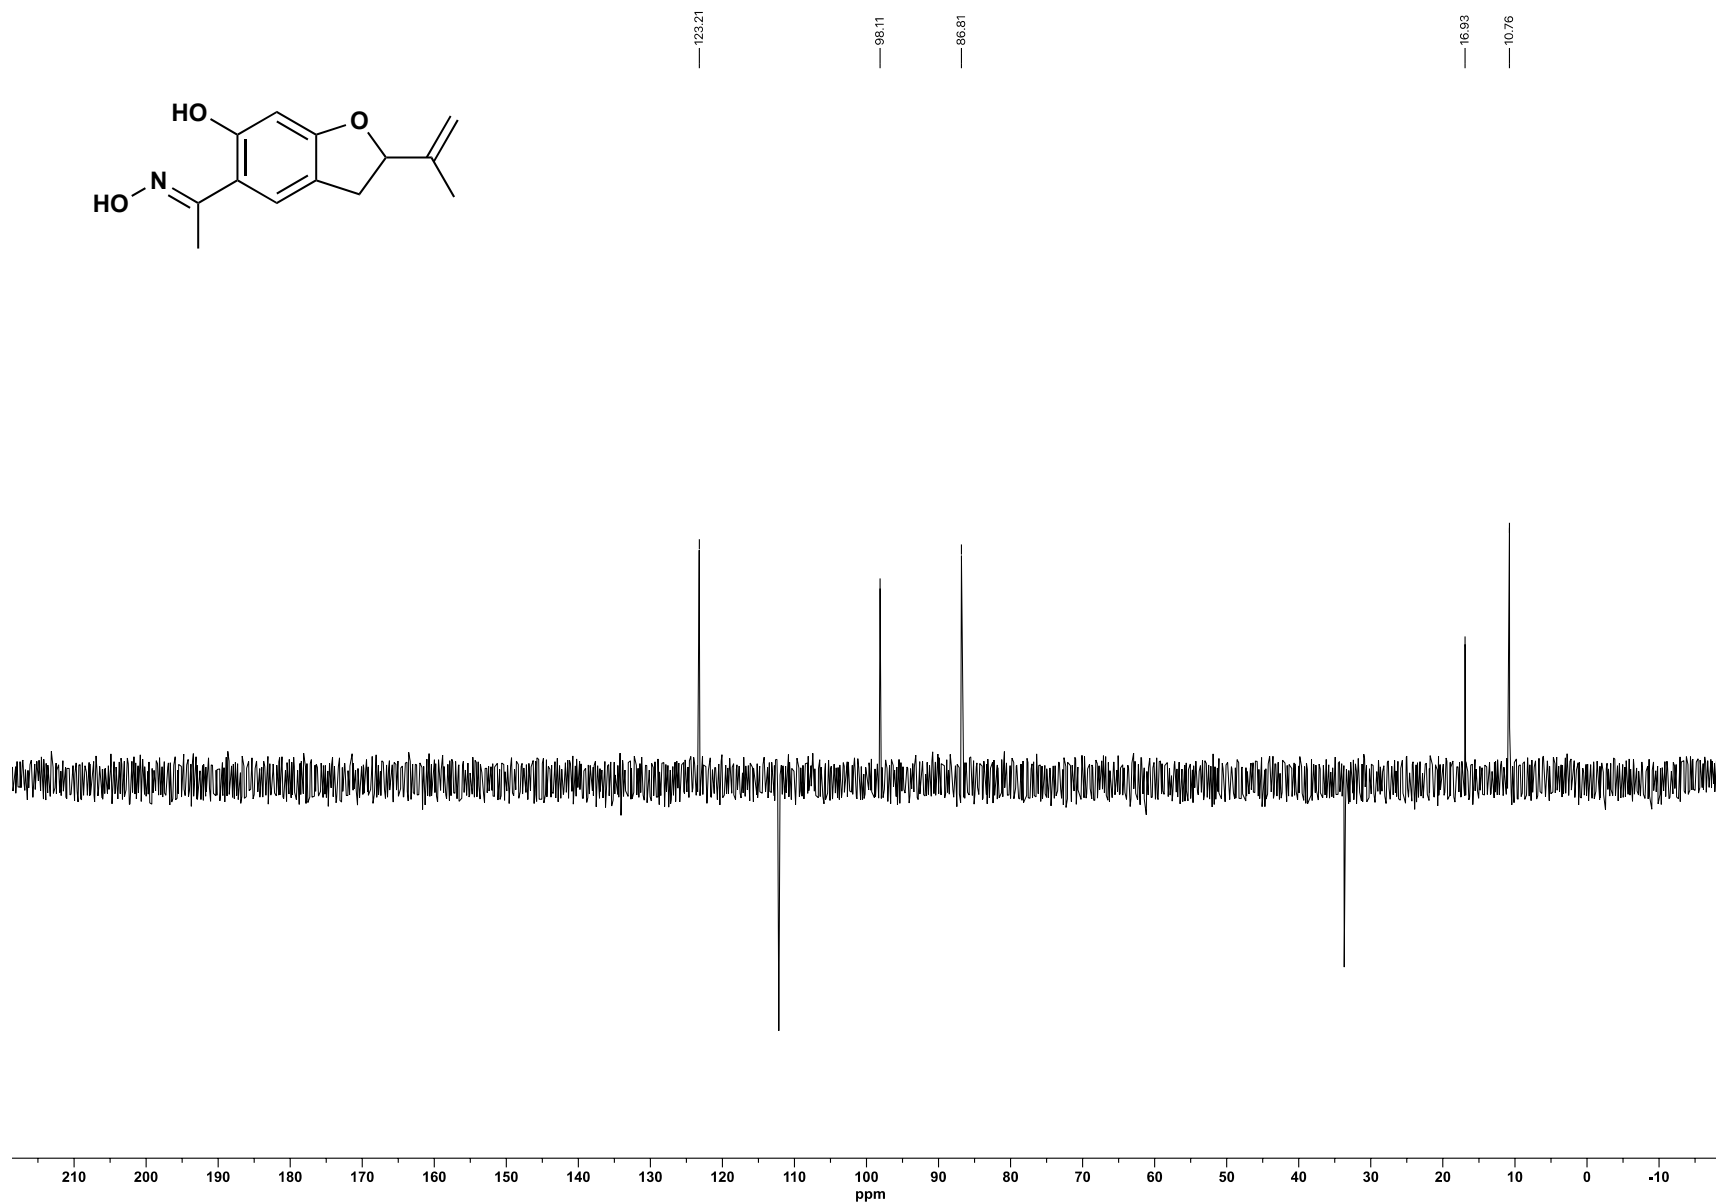

Supplementary figure 10.- DEPT135 spectrum of 6-hydroxy-2-isopropenyl-5-acetyloxime-2,3-dihydrobenzofuran

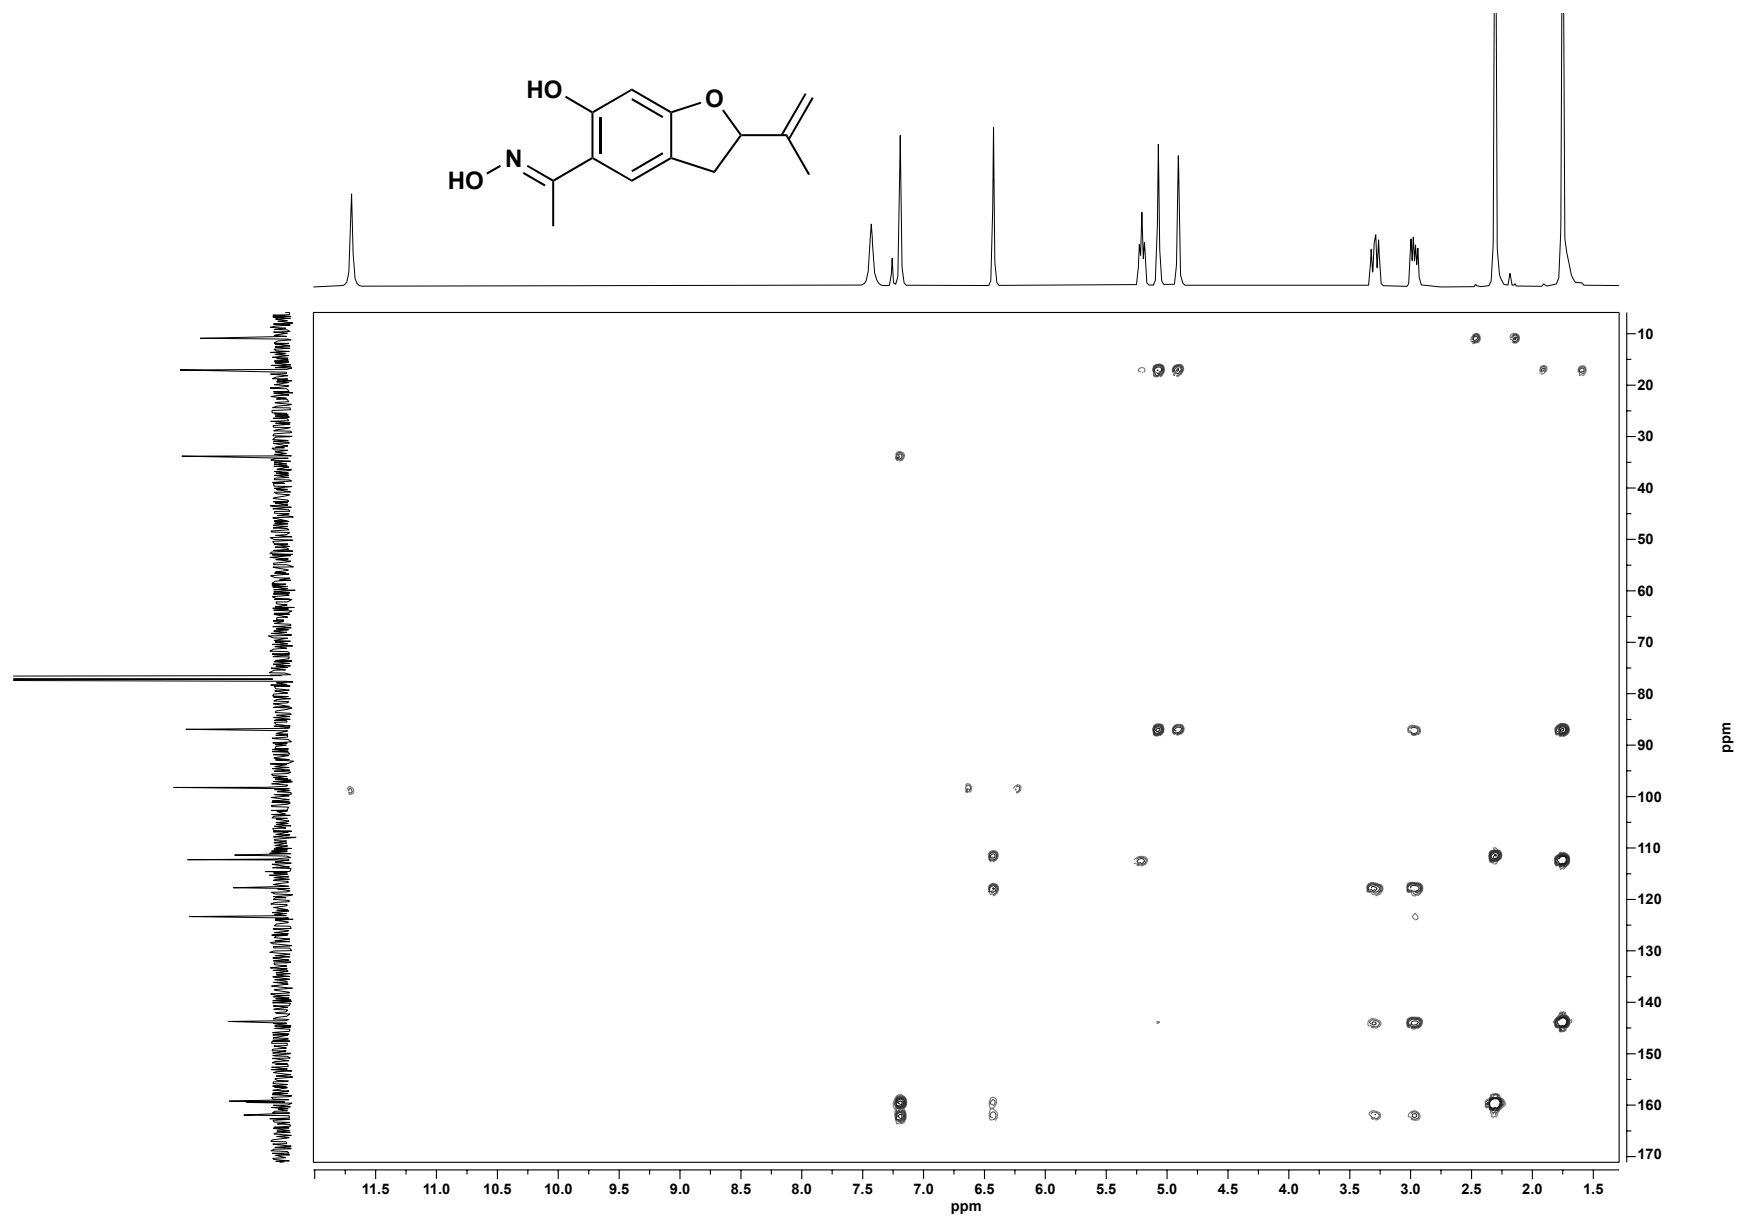

Supplementary figure 11.- HMBC spectrum of 6-hydroxy-2-isopropenyl-5-acetyloxime-2,3-dihydrobenzofuran

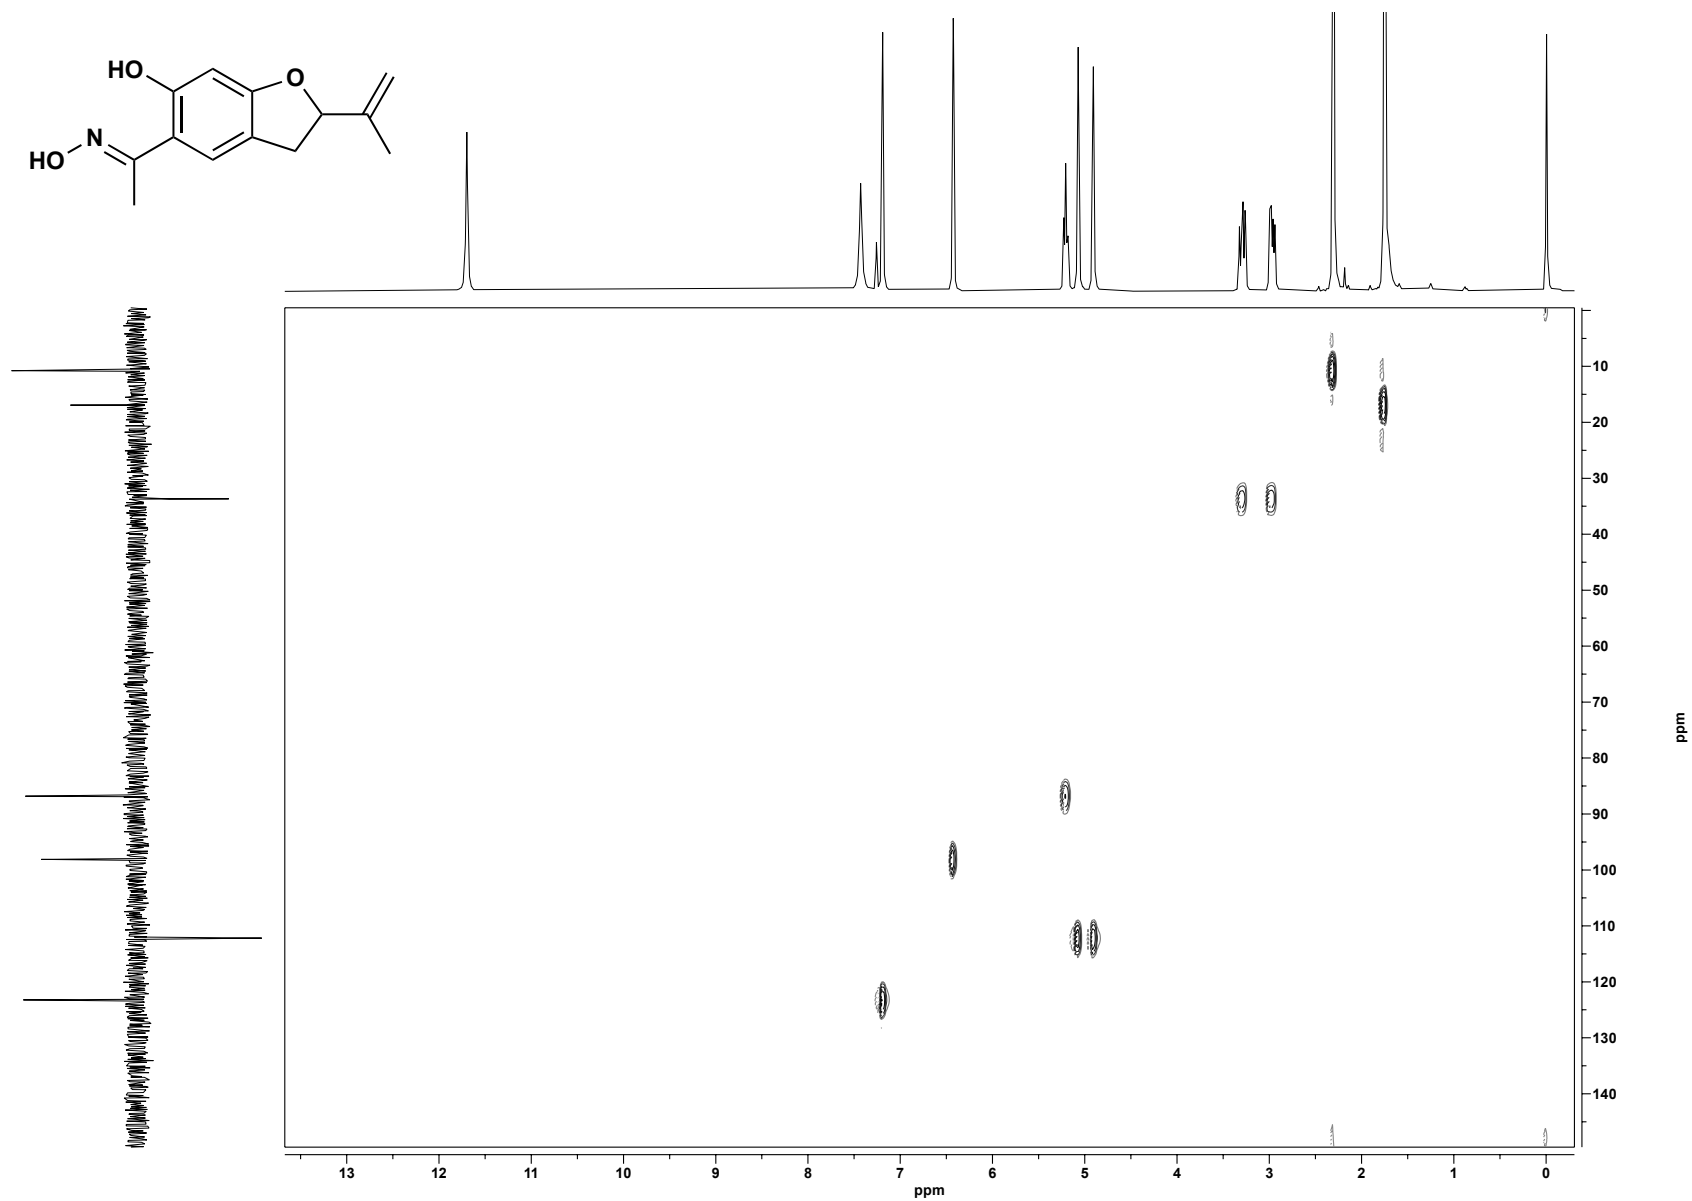

Supplementary figure 12.- HMQC spectrum of 6-hydroxy-2-isopropenyl-5-acetyloxime-2,3-dihydrobenzofuran

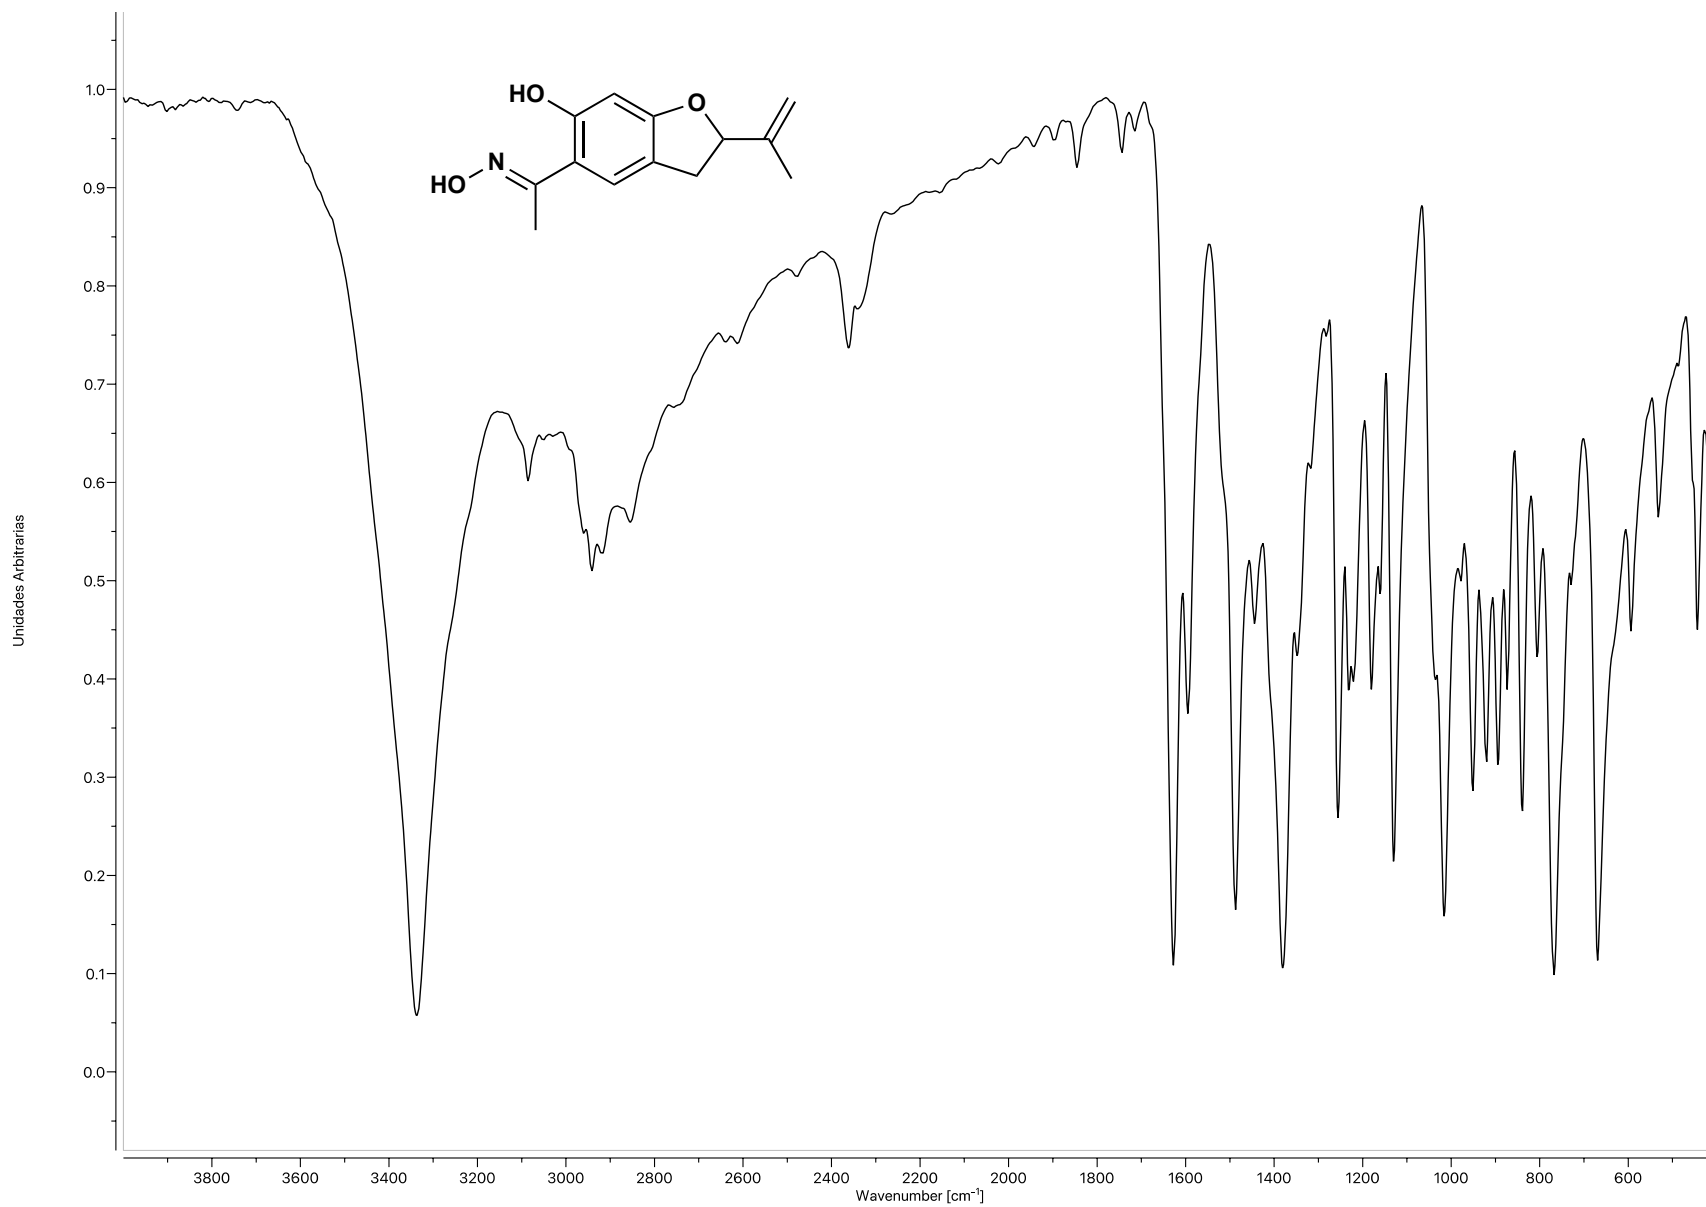

**Supplementary figure 13.-** FT-IR spectrum of 6-hydroxy-2-isopropenyl-5-acetyloxime-2,3-dihydrobenzofuran

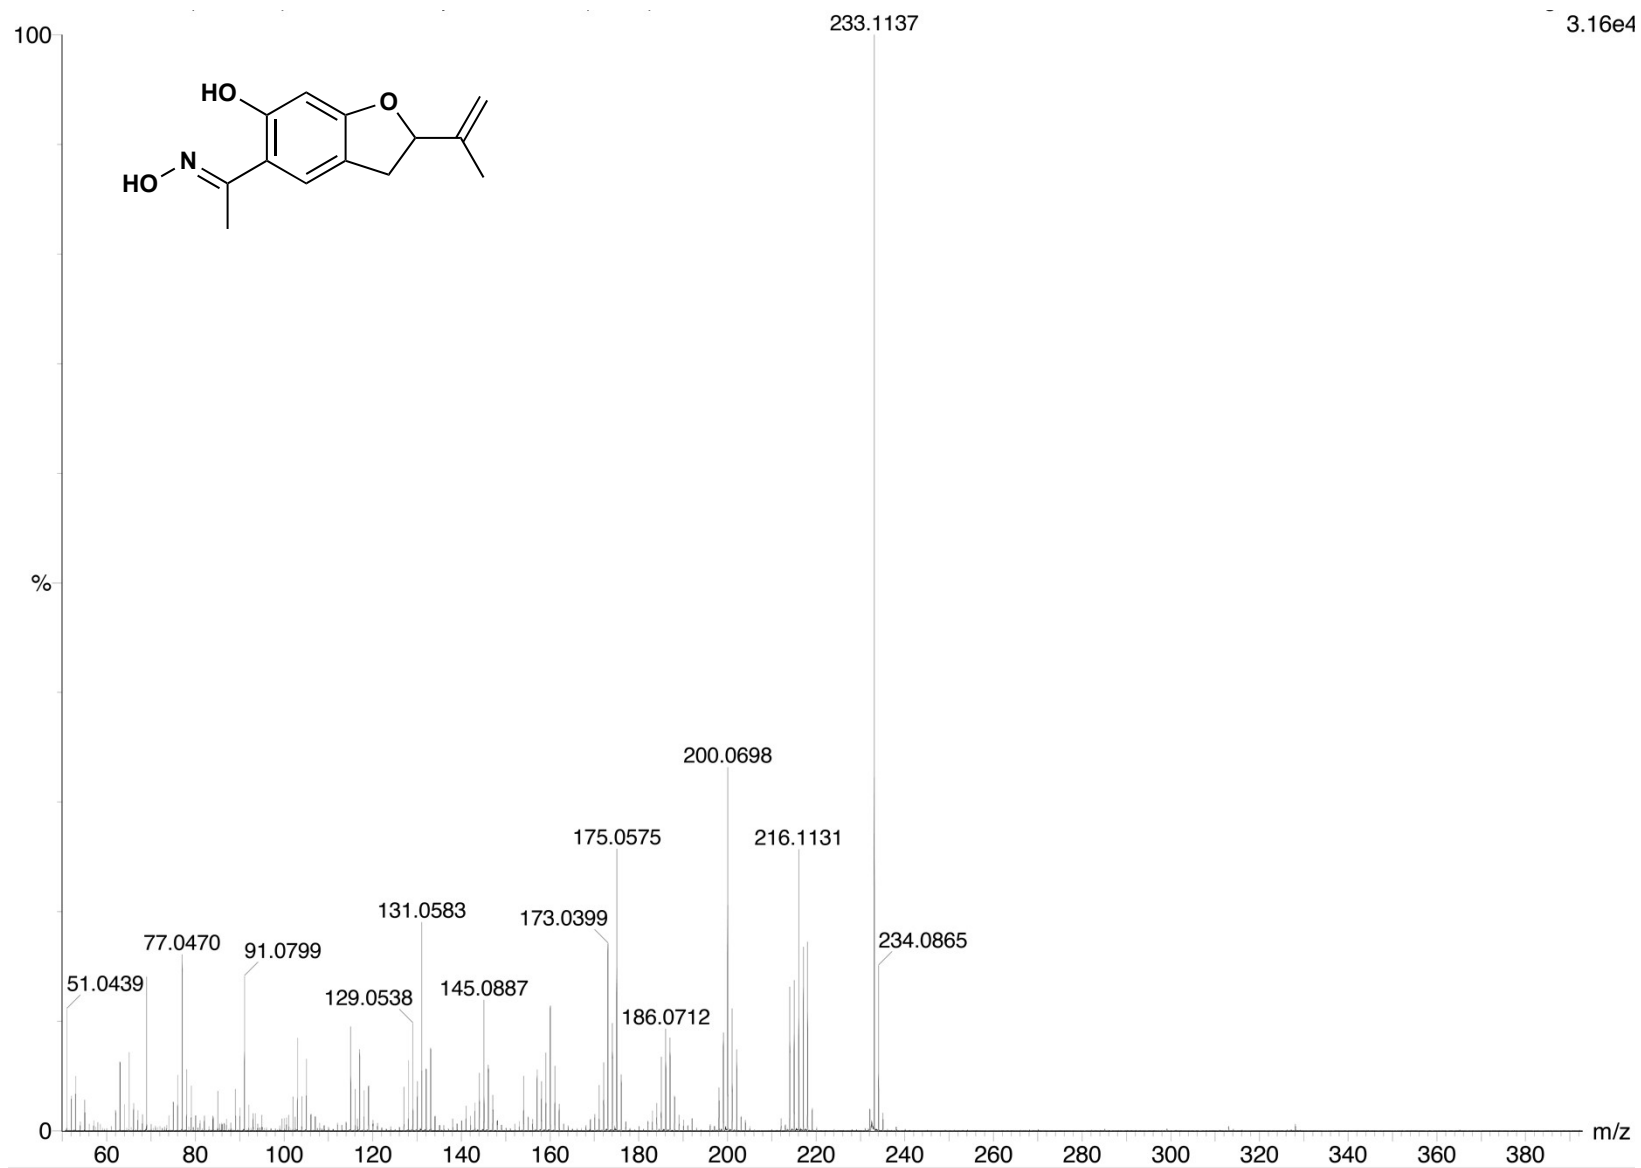

**Supplementary figure 14.-** HR EI-MS spectrum of 6-hydroxy-2-isopropenyl-5-acetyloxime-2,3-dihydrobenzofuran
